# Supplementary material for: Assessing the Quality of Mobile Exercise Apps Based on the American College of Sports Medicine Guidelines: A Reliable and Valid Scoring Instrument
Source: PubMed Central journal article supplement (PMC5360889; doi:10.2196/jmir.6976), 2017-03-07
Supplement: jmir_v19i3e67_app2.pdf [file jmir_v19i3e67_app2.pdf]

## Appendix 2. Final scores of the apps evaluated with the scoring instrument, by section.

| Rank | App                                           | Overall     | Section I   | Section I.A. | Section I.B. | Section I.C. | Section II  | Section II.A. | Section II.B. | Section II.C. | Section III | Section III.A. | Section III.B. |
|------|-----------------------------------------------|-------------|-------------|--------------|--------------|--------------|-------------|---------------|---------------|---------------|-------------|----------------|----------------|
| 1    | Johnson and Johnson Official 7-Minute Workout | 33.5        | 16.3        | 10.0         | 2.8          | 3.5          | 17.2        | 9.3           | 3.2           | 4.7           | .           | .              | .              |
| 2    | Nike+ Training Club                           | 32.6        | 10.0        | 2.0          | 3.2          | 4.8          | 19.5        | 4.7           | 6.2           | 8.7           | 3.1         | 1.0            | 2.1            |
| 3    | Running for Weight Loss: Interval Training    | 32.6        | 26.7        | 10.0         | 7.9          | 8.8          | .           | .             | .             | .             | 3.5         | 1.0            | 2.5            |
| 4    | Fitness Buddy Free                            | 31.0        | 8.1         | 2.0          | 3.6          | 2.5          | 22.9        | 8.7           | 8.6           | 5.7           | .           | .              | .              |
| 5    | FitnessBuilder                                | 28.3        | .           | .            | .            | .            | 21.2        | 8.7           | 8.0           | 4.5           | 7.1         | 4.3            | 2.8            |
| 6    | JEFIT                                         | 27.5        | 8.4         | 2.0          | 2.9          | 3.5          | 16.3        | 5.3           | 6.5           | 4.5           | 2.8         | 1.0            | 1.8            |
| 7    | Body Space                                    | 26.2        | 9.0         | 2.7          | 3.5          | 2.8          | 14.9        | 6.0           | 5.5           | 3.3           | 2.4         | 1.0            | 1.4            |
| 8    | Daily Workouts Free                           | 25.5        | 13.0        | 5.3          | 4.1          | 3.5          | 12.5        | 6.0           | 3.7           | 2.8           | .           | .              | .              |
| 9    | StrongLifts 5x5                               | 24.0        | .           | .            | .            | .            | 24.0        | 8.7           | 8.3           | 7.0           | .           | .              | .              |
| 10   | Jillian Michaels Slim Down                    | 19.9        | .           | .            | .            | .            | 19.9        | 9.3           | 5.0           | 5.5           | .           | .              | .              |
| 11   | Fitness Point-Workout Exercise                | 19.0        | .           | .            | .            | .            | 19.0        | 10.0          | 5.7           | 3.3           | .           | .              | .              |
| 12   | C25K-5K Trainer Free                          | 17.7        | 17.7        | 2.7          | 7.2          | 7.8          | .           | .             | .             | .             | .           | .              | .              |
| 13   | 7 Minute Workout                              | 17.5        | 8.7         | 2.7          | 3.7          | 2.3          | 8.8         | 2.7           | 3.4           | 2.7           | .           | .              | .              |
| 14   | SworKit                                       | 17.5        | 7.0         | 2.0          | 2.7          | 2.3          | 8.0         | 2.7           | 3.1           | 2.2           | 2.5         | 1.0            | 1.5            |
| 15   | 7- Minute Workout- Fitness for Women          | 16.9        | 7.0         | 2.0          | 2.8          | 2.2          | 9.9         | 2.7           | 3.4           | 3.8           | .           | .              | .              |
| 16   | Abs Workout: Get Your Six Pack                | 14.9        | .           | .            | .            | .            | 14.9        | 9.3           | 3.2           | 2.3           | .           | .              | .              |
| 17   | Daily Butt Workout Free                       | 14.9        | .           | .            | .            | .            | 14.9        | 8.0           | 3.9           | 3.0           | .           | .              | .              |
| 18   | Instant Abs Trainer                           | 12.2        | .           | .            | .            | .            | 12.2        | 4.0           | 4.4           | 3.8           | .           | .              | .              |
| 19   | FitStar                                       | 11.3        | .           | .            | .            | .            | 8.9         | 2.7           | 2.8           | 3.5           | 2.4         | 1.3            | 1.1            |
| 20   | Daily Ab Workout Free                         | 11.3        | .           | .            | .            | .            | 11.3        | 6.7           | 2.7           | 2.0           | .           | .              | .              |
| 21   | Workout Trainer                               | 10.0        | .           | .            | .            | .            | 10.0        | 2.7           | 4.2           | 3.2           | .           | .              | .              |
| 22   | Runtastic Six Pack Abs Trainer                | 9.1         | .           | .            | .            | .            | 9.1         | 2.0           | 5.0           | 2.2           | .           | .              | .              |
| 23   | The 7 Minute Workout- Get Fit                 | 8.4         | .           | .            | .            | .            | 8.4         | 2.7           | 3.2           | 2.5           | .           | .              | .              |
| 24   | Cardio-Heart Rate Monitor + 7 Minute Workout  | 8.4         | .           | .            | .            | .            | 8.4         | 2.0           | 3.0           | 3.3           | .           | .              | .              |
| 25   | Belly Fat Workout Free                        | 8.3         | .           | .            | .            | .            | 8.3         | 2.7           | 2.8           | 2.8           | .           | .              | .              |
| 26   | Strava Running and Cycling                    | 8.0         | 8.0         | 2.7          | 2.5          | 2.8          | .           | .             | .             | .             | .           | .              | .              |
| 27   | Simply Yoga Free                              | 6.4         | .           | .            | .            | .            | .           | .             | .             | .             | 6.4         | 3.3            | 3.1            |
| 28   | Daily Yoga-Lose Weight, Get Relief            | 6.2         | .           | .            | .            | .            | .           | .             | .             | .             | 6.2         | 3.3            | 2.8            |
|      | <b>Mean</b>                                   | <b>17.8</b> | <b>11.7</b> | <b>3.8</b>   | <b>3.9</b>   | <b>3.9</b>   | <b>13.9</b> | <b>5.5</b>    | <b>4.6</b>    | <b>3.8</b>    | <b>4.0</b>  | <b>1.9</b>     | <b>2.1</b>     |
|      | <b>Standard Deviation</b>                     | <b>8.9</b>  | <b>5.9</b>  | <b>3.0</b>   | <b>1.8</b>   | <b>2.2</b>   | <b>5.2</b>  | <b>2.9</b>    | <b>1.8</b>    | <b>1.6</b>    | <b>1.9</b>  | <b>1.3</b>     | <b>0.7</b>     |

Note:

1. The highest possible overall score is 70; the highest possible sections I and II score is 30; the highest possible section III score is 10.
2. Section I is Aerobic Exercise; Section II is Strength and Resistance; Section III is Flexibility.
3. Sub-section A is Safety; Sub-section B is Program Principles; Sub-section C is Single Training Session Principles.
